# Supplementary material for: Assessment of Feed Value of Chicory and Lucerne for Poultry, Determination of Bioaccessibility of Their Polyphenols and Their Effects on Caecal Microbiota
Source: MDPI journal article supplement (doi:10.3390/fermentation8050237), 2022-05-20
Supplement: s1 [file s1]

Archive with 1 entries (1 files):
- fermentation-1723261-supplementary.pdf
